# Supplementary material for: Distinct ossification trade-offs illuminate the shoulder girdle reconfiguration at the water-to-land transition.
Source: Research Square preprint supplement (doi:10.21203/rs.3.rs-3353279/v1), 2023-10-16
Supplement: Supplementary file 3 [file c28ab1ab55cdc5a690a2fd2e.xlsx]

## Sheet: Sheet1
Species	Scientific name	Taxonomy	Gene name	Gene ID	Protein ID	Genome Assembly	Assembly ID	Source
Fruitfly	Drosophila melanogaster		sax	FBgn0003317	FBpp0300982	BDGP6.32	GCA_000001215.4	NCBI
Florida lancelet	Branchistoma floridae	Cephalochordata	LOC118405722	XM_035805399/LOC118405722	XP_035661292	Bfl_VNyyK	GCF_000003815.2	NCBI
Vase tunicate	Ciona intestinalis	Tunicata	tgfbr-ia	ENSCING00000001649	ENSCINP00000003351	KH	GCA_000224145.1	Ensembl
Hagfish	Eptatretus burgeri	Cyclostomata	acvr1-1	ENSEBUG00000011864	ENSEBUP00000019035	Eburgeri_3.2	GCA_900186335.2	Ensembl
			acvr1-2	ENSEBUG00000015833	ENSEBUP00000025693	Eburgeri_3.2	GCA_900186335.2	Ensembl
Lamprey	Petromyzon marinus	Cyclostomata	acvr1-1	ENSPMAG00000006293	ENSPMAP00000006959	Pmarinus_7.0	Pmarinus_7.0	Ensembl
			acvr1-2	ENSPMAG00000005274	ENSPMAP00000005834	Pmarinus_7.0	Pmarinus_7.0	Ensembl
Ghost shark	Callorhinchus milii	Chondrichthyes	acvr1	ENSCMIG00000009127	ENSCMIP00000019637	Callorhinchus_milii-6.1.3	GCA_000165045.2	Ensembl
			acvr1l	ENSCMIG00000015665	ENSCMIP00000037181	Callorhinchus_milii-6.1.3	GCA_000165045.2	Ensembl
			acvrl1	NCBI GeneID:103189515	XP_042200338.1	IMCB_Cmil_1.0	GCF_018977255.1	NCBI
Little skate	Leucoraja erinacea	Chondrichthyes	acvr1	XM_055638101/LOC129698809	XP_055494076	Leri_hhj_1	GCF_028641065.1	NCBI
			acvr1l	XM_055634624/LOC129696580	XP_055490599	Leri_hhj_1	GCF_028641065.1	NCBI
			acvrl1	XM_055664597/LOC129714766	XP_055520572	Leri_hhj_1	GCF_028641065.1	NCBI
Reedfish	Erpetoichthys calabaricus	Polypteriformes	acvr1	ENSECRG00000007343	ENSECRP00000011164	fErpCal1.1	GCA_900747795.2	Ensembl
			acvr1l	not detected
			acvrl1	not detected
Gray bichir	Polypterus senegalus	Polypteriformes	acvr1	NCBI GeneID:120531753	XP_039613379.1	ASM1683550v1	GCF_016835505.1	NCBI
			acvr1l	not detected
			acvrl1	NCBI GeneID:120524833	XP_039602546.1	ASM1683550v1	GCF_016835505.1	NCBI
Spotted gar	Lepisosteus oculatus	Holostei	acvr1	ENSLOCG00000005862	ENSLOCP00000007079	LepOcu1	GCA_000242695.1	Ensembl
			acvr1l	ENSLOCG00000006702	ENSLOCP00000008096	LepOcu1	GCA_000242695.1	Ensembl
			acvrl1	ENSLOCG00000007620	ENSLOCP00000009245	LepOcu1	GCA_000242695.1	Ensembl
Bowfin	Amia calva	Holostei	acvr1	AMCG00000944	AMCP00000944	AmiCal1	GCA_017591415.1	Thompson et al. (2022)
			acvr1l	AMCG00009117	AMCP00009117	AmiCal1	GCA_017591415.1	Thompson et al. (2022)
			acvrl1	AMCG00008865	AMCP00008865	AmiCal1	GCA_017591415.1	Thompson et al. (2022)
Arowana	Scleropages formosus	Osteoglossomorpha	acvr1	ENSSFOG00015014774	ENSSFOP00015076345	fSclFor1.1	GCA_900964775.1	Ensembl
			acvr1l	ENSSFOG00015007275	ENSSFOP00015011287	fSclFor1.1	GCA_900964775.1	Ensembl
			acvrl1a	ENSSFOG00015004509	ENSSFOP00015006821	fSclFor1.1	GCA_900964775.1	Ensembl
			acvrl1b	ENSSFOG00015030585	ENSSFOP00015023009	fSclFor1.1	GCA_900964775.1	Ensembl
European eel	Anguilla anguilla	Elopomorpha	acvr1a	LOC118223491	XP_035265991.1	fAngAng1.pri	GCF_013347855.1	NCBI
			acvr1b	LOC118214492		fAngAng1.pri	GCF_013347855.1	NCBI
			acvr1l	ENSAANG00010028145	ENSAANP00010074413	fAngAng1.pri	GCA_013347855.1	Ensembl
			acvrl1	ENSAANG00010027143	ENSAANP00010071150	fAngAng1.pri	GCA_013347855.1	Ensembl
Zebrafish	Danio rerio	Clupeocephala	acvr1	not detected
			acvr1l	XM_021478751.1	XP_021334426.1	GRCz11	GCF_000002035.6	NCBI
			acvrl1	ENSDARG00000018179	ENSDARP00000043461	GRCz11	GCA_000002035.4	Ensembl
Medaka	Oryzias latipes	Clupeocephala	acvr1	ENSORLG00000016722		ASM223467v1	GCA_002234675.1
			acvr1l	ENSORLG00000013834	ENSORLP00000017343	ASM223467v1	GCA_002234675.1	Ensembl
			acvrl1	ENSORLG00000007548	ENSORLP00000009460	ASM223467v1	GCA_002234675.1	Ensembl
Coelacanth	Latimeria chalumnae	Coelacanthimorpha	Acvr1	ENSLACG00000009962	ENSLACP00000011323	LatCha1	GCA_000225785.1	Ensembl
			Acvr1l	ENSLACG00000004610	ENSLACP00000005189	LatCha1	GCA_000225785.1	Ensembl
			Acvrl1	ENSLACG00000019117	ENSLACP00000021754	LatCha1	GCA_000225785.1	Ensembl
West African lungfish	Protopterus annectens	Dipnomorpha	Acvr1	122804719	XP_043930704.1	PAN1.0	GCF_019279795.1	NCBI
			Acvr1l	122796618	XP_043921166.1	PAN1.0	GCF_019279795.1	NCBI
			Acvrl1	122811760	XP_043939750.1	PAN1.0	GCF_019279795.1	NCBI
Western clawed frog	Xenopus tropicalis	Amphibia	Acvr1	ENSXETG00000010380	ENSXETP00000094246	UCB_Xtro_10.0	GCA_000004195.4	Ensembl
			Acvr1l	not detected
			Acvrl1	ENSXETG00000031897	ENSXETP00000059199	UCB_Xtro_10.0	GCA_000004195.4	Ensembl
Spiny toad	Leptobrachium leishanense	Amphibia	Acvr1	ENSLLEG00000019218	ENSLLEP00000030326	ASM966780v1	GCA_009667805.1	Ensembl
			Acvr1l	not detected
			Acvrl1	ENSLLEG00000027421	ENSLLEP00000043111	ASM966780v1	GCA_009667805.1	Ensembl
Two-lined caecilian	Rhinatrema bivittatum	Amphibia	Acvr1	115093590	XP_029461391	aRhiBiv1.1	GCF_901001135.1	NCBI
			Acvr1l	not detected
			Acvrl1	115087394	XP_029450387	aRhiBiv1.1	GCF_901001135.1	NCBI
Turtle	Chrysemys picta bellii	Testudinata	Acvr1	ENSCPBG00000026496	ENSCPBP00000038331	Chrysemys_picta_bellii-3.0.3	GCA_000241765.2	Ensembl
			Acvr1l	not detected
			Acvrl1	ENSCPBG00000019466	ENSCPBP00000027533	Chrysemys_picta_bellii-3.0.3	GCA_000241765.2	Ensembl
Tuatara	Sphenodon	Lepidosauria	Acvr1	ENSSPUG00000016862	ENSSPUP00000021962	ASM311381v1	GCA_003113815.1	Ensembl
			Acvr1l	not detected
			Acvrl1	ENSSPUG00000016412	ENSSPUP00000021343	ASM311381v1	GCA_003113815.1	Ensembl
Anole lizard	Anolis carolinensis		Acvr1	ENSACAG00000007562	ENSACAP00000007502	AnoCar2.0v2	GCA_000090745.2	Ensembl
			Acvr1l	not detected
			Acvrl1	ENSACAG00000016876	ENSACAP00000016634	AnoCar2.0v2	GCA_000090745.2	Ensembl
Saltwater crocodile	Crocodylus porosus	Crocodylia	Acvr1	ENSCPRG0000500898	ENSCPRP00005012641	CroPor_comp1	GCA_001723895.1	Ensembl
			Acvr1l	ENSCPRG00005013435	ENSCPRP00005019221	CroPor_comp1	GCA_001723895.1	Ensembl
			Acvrl1	109324463	XP_019412011.1	CroPor_comp1	GCF_001723895.1	NCBI
American alligator	Alligator mississippiensis	Crocodylia	Acvr1	102569539	XP_014455085.1	ASM28112v4	GCF_000281125.3	NCBI
			Acvr1l	102559894	XP_014458431.1	ASM28112v4	GCF_000281125.3	NCBI
			Acvrl1	102572013	XP_019353111.1	ASM28112v4	GCF_000281125.3	NCBI
Chicken	Gallus gallus	Aves	ACVR1	ENSGALG00010010745	ENSGALP00010014495	GRCg6a	GCA_000002315.5	Ensembl
			ACVR1L	not detected
			ACVRL1	ENSGALG00000035635	ENSGALP00000047403	GRCg6a	GCA_000002315.5	Ensembl
Zebra finch	Taeniopygia guttata	Aves	ACVR1	ENSTGUG00000012182	ENSTGUP0000001255	bTaeGut1_v1.p	GCA_003957565.2	Ensembl
			ACVR1L	not detected
			ACVRL1	ENSTGUG00000003267	ENSTGUP00000003374	bTaeGut1_v1.p	GCA_003957565.2	Ensembl
Platypus	Ornithorhynchus anatinus	Mammalia	Acvr1	ENSOANG00000006134	ENSOANP00000052674	mOrnAna1.p.v1	GCA_004115215.2	Ensembl
			Acvr1l	not detected
			Acvrl1	ENSOANG00000003970	ENSOANP00000006283	mOrnAna1.p.v1	GCA_004115215.2	Ensembl
Opossum	Monodelphis domestica	Mammalia	Acvr1	ENSMODG00000004431	ENSMODP00000044445	ASM229v1	GCA_000002295.1	Ensembl
			Acvr1l	not detected
			Acvrl1	ENSMODG00000014248	ENSMODP00000017803	ASM229v1	GCA_000002295.1	Ensembl
Mouse	Mus musculus	Mammalia	Acvr1	ENSMUSG00000026836	ENSMUSP00000088453	GRCm39	GCA_000001635.9	Ensembl
			Acvr1l	not detected
			Acvrl1	ENSMUSG00000000530	ENSMUSP00000000542	GRCm39	GCA_000001635.9	Ensembl
Human	Homo sapiens	Mammalia	ACVR1	ENSG00000115170	ENSP00000405004	GRCh38.p13	GCA_000001405.28	Ensembl
			ACVR1L	not detected
			ACVRL1	ENSG00000139567	ENSP00000373574	GRCh38.p13	GCA_000001405.28	Ensembl
